# Supplementary material
Source: PubMed Central journal article supplement (PMC8419121)
Supplement: mmc1.pdf [file mmc1.pdf]

## 1. Supplementary tables

**Table S1.** Dynamics of inflammatory markers regarding remdesivir administration in KT recipients with COVID-19.

|                                     | Levels at admission                          | Levels at remdesivir administration          | Levels post remdesivir                         | P-value (*) | P- value (\$) |
|-------------------------------------|----------------------------------------------|----------------------------------------------|------------------------------------------------|-------------|---------------|
| CRP (mg/L median [IQR])             | 50.5 [7.6 – 109.5]<br>( <i>n</i> = 50)       | 53.6 [9.1 – 114.7]<br>( <i>n</i> = 46)       | 7.2 [1.4 – 31.5]<br>( <i>n</i> = 44)           | 0.292       | 0.001         |
| Procalcitonin (ng/mL, median [IQR]) | 0.3 [0.1 – 0.8]<br>( <i>n</i> = 38)          | 0.1 [0.1 – 0.4]<br>( <i>n</i> = 38)          | 0.1 [0 – 0.2]<br>0.2 ( <i>n</i> = 31)          | 0.005       | 0.106         |
| IL-6 (pg/ml, median [IQR])          | 0.3 [0.1 – 0.8]<br>( <i>n</i> = 34)          | 40.9 [17.8 – 88]<br>( <i>n</i> = 26)         | 73.2 [4.8 - 481]<br>( <i>n</i> = 14)           | 0.638       | 0.508         |
| LDH (UI/L, median [IQR])            | 295 [238.5 – 361.5]<br>( <i>n</i> = 46)      | 327 [244 - 403]<br>( <i>n</i> = 39)          | 309 [248 - 375]<br>( <i>n</i> = 40)            | 0.025       | 0.427         |
| Ferritin (ng/mL, median [IQR])      | 520<br>[295.5 – 1,134.5]<br>( <i>n</i> = 45) | 728<br>[373.5 – 1,345.5]<br>( <i>n</i> = 38) | 614.5<br>[228.2 – 1,237.3]<br>( <i>n</i> = 32) | <0.001      | 0.071         |
| D-dimer (mcg/L, median [IQR])       | 667 [225 – 1,261]<br>( <i>n</i> = 45)        | 682 [250 – 1,187]<br>( <i>n</i> = 42)        | 636 [272 – 1,700]<br>( <i>n</i> = 35)          | 0.636       | 0.090         |

(\*) Comparison between levels at admission and levels at remdesivir initiation.

(\$) Comparison between levels at remdesivir administration and levels post-remdesivir.

CRP: c-reactive protein, IL-6: interleukine-6, IQR: interquartilic range, LDH: lactate dehydrogenase.

## 2. STROBE statement

### Modified STROBE Statement—checklist of items that should be included in reports of observational studies (Cohort/Cross-sectional and case-control studies)

|                              | Item No | Recommendation                                                                                                                                                                                                                                                                                                                                                                                                                                                                 | Page number |
|------------------------------|---------|--------------------------------------------------------------------------------------------------------------------------------------------------------------------------------------------------------------------------------------------------------------------------------------------------------------------------------------------------------------------------------------------------------------------------------------------------------------------------------|-------------|
| <b>Title and abstract</b>    | 1       | (a) Indicate the study's design with a commonly used term in the title or the abstract                                                                                                                                                                                                                                                                                                                                                                                         | 5           |
|                              |         | (b) Provide in the abstract an informative and balanced summary of what was done and what was found                                                                                                                                                                                                                                                                                                                                                                            | 5           |
| <b>Introduction</b>          |         |                                                                                                                                                                                                                                                                                                                                                                                                                                                                                |             |
| Background/rationale         | 2       | Explain the scientific background and rationale for the investigation being reported                                                                                                                                                                                                                                                                                                                                                                                           | 6-7         |
| Objectives                   | 3       | State specific objectives, including any prespecified hypotheses                                                                                                                                                                                                                                                                                                                                                                                                               | 7           |
| <b>Methods</b>               |         |                                                                                                                                                                                                                                                                                                                                                                                                                                                                                |             |
| Study design                 | 4       | Present key elements of study design early in the paper                                                                                                                                                                                                                                                                                                                                                                                                                        | 8           |
| Setting                      | 5       | Describe the setting, locations, and relevant dates, including periods of recruitment, exposure, follow-up, and data collection                                                                                                                                                                                                                                                                                                                                                | 8-9         |
| Participants                 | 6       | (a) <i>Cohort study</i> —Give the eligibility criteria, and the sources and methods of selection of participants. Describe methods of follow-up<br><br><i>Case-control study</i> —Give the eligibility criteria, and the sources and methods of case ascertainment and control selection. Give the rationale for the choice of cases and controls<br><br><i>Cross-sectional study</i> —Give the eligibility criteria, and the sources and methods of selection of participants | 8-9         |
| Variables                    | 7       | Clearly define all outcomes, exposures, predictors, potential confounders, and effect modifiers. Give diagnostic criteria, if applicable                                                                                                                                                                                                                                                                                                                                       | 8-9         |
| Data sources/<br>measurement | 8*      | For each variable of interest, give sources of data and details of methods of assessment (measurement).                                                                                                                                                                                                                                                                                                                                                                        | 8-10        |

|                        |     |                                                                                                                                                                                                                                                                                                                   |       |
|------------------------|-----|-------------------------------------------------------------------------------------------------------------------------------------------------------------------------------------------------------------------------------------------------------------------------------------------------------------------|-------|
| Bias                   | 9   | Describe any efforts to address potential sources of bias                                                                                                                                                                                                                                                         | 8-10  |
| Study size             | 10  | Explain how the study size was arrived at (if applicable)                                                                                                                                                                                                                                                         | 8     |
| Quantitative variables | 11  | Explain how quantitative variables were handled in the analyses. If applicable, describe which groupings were chosen and why                                                                                                                                                                                      | 10    |
| Statistical methods    | 12  | (a) Describe all statistical methods, including those used to control for confounding                                                                                                                                                                                                                             | 8-10  |
|                        |     | (b) Describe any methods used to examine subgroups and interactions                                                                                                                                                                                                                                               | 8-10  |
|                        |     | (c) Explain how missing data were addressed                                                                                                                                                                                                                                                                       | 8-10  |
|                        |     | (d) <i>Cohort study</i> —If applicable, explain how loss to follow-up was addressed<br><br><i>Case-control study</i> —If applicable, explain how matching of cases and controls was addressed<br><br><i>Cross-sectional study</i> —If applicable, describe analytical methods taking account of sampling strategy | 8-10  |
|                        |     | (e) Describe any sensitivity analyses                                                                                                                                                                                                                                                                             | 8-10  |
| <b>Results</b>         |     |                                                                                                                                                                                                                                                                                                                   |       |
| Participants           | 13* | (a) Report numbers of individuals at each stage of study—eg numbers potentially eligible, examined for eligibility, confirmed eligible, included in the study, completing follow-up, and analyzed                                                                                                                 | 11    |
|                        |     | (c) <b>Use of a flow diagram</b>                                                                                                                                                                                                                                                                                  | NA    |
| Descriptive data       | 14* | (a) Give characteristics of study participants (eg demographic, clinical, social) and information on exposures and potential confounders                                                                                                                                                                          | 11    |
|                        |     | (b) Indicate number of participants with missing data for each variable of interest                                                                                                                                                                                                                               | 12-13 |
|                        |     | (c) <i>Cohort study</i> —Summarise follow-up time (eg, average and total amount)                                                                                                                                                                                                                                  | 11-13 |
| Outcome data           | 15* | <i>Cohort study</i> —Report numbers of outcome events or summary measures over time                                                                                                                                                                                                                               | 11-13 |

|                   |    |                                                                                                                                                                                                              |       |
|-------------------|----|--------------------------------------------------------------------------------------------------------------------------------------------------------------------------------------------------------------|-------|
|                   |    | <i>Case-control study</i> —Report numbers in each exposure category, or summary measures of exposure                                                                                                         | NA    |
|                   |    | <i>Cross-sectional study</i> —Report numbers of outcome events or summary measures                                                                                                                           | NA    |
| Main results      | 16 | (a) Give unadjusted estimates and, if applicable, confounder-adjusted estimates and their precision (eg, 95% confidence interval). Make clear which confounders were adjusted for and why they were included | 11-13 |
| Other analyses    | 17 | Report other analyses done—eg analyses of subgroups and interactions, and sensitivity analyses                                                                                                               | 12-13 |
| <b>Discussion</b> |    |                                                                                                                                                                                                              |       |
| Key results       | 18 | Summarise key results with reference to study objectives                                                                                                                                                     | 14    |
| Limitations       | 19 | Discuss limitations of the study, taking into account sources of potential bias or imprecision. Discuss both direction and magnitude of any potential bias                                                   | 17    |
| Interpretation    | 20 | Give a cautious overall interpretation of results considering objectives, limitations, multiplicity of analyses, results from similar studies, and other relevant evidence                                   | 17    |
| Generalisability  | 21 | Discuss the generalisability (external validity) of the study results                                                                                                                                        | 14-17 |

\*Give information separately for cases and controls in case-control studies and, if applicable, for exposed and unexposed groups in cohort and cross-sectional studies.

**Note:** An Explanation and Elaboration article discusses each checklist item and gives methodological background and published examples of transparent reporting. The STROBE checklist is best used in conjunction with this article (freely available on the Web sites of PLoS Medicine at <http://www.plosmedicine.org/>, Annals of Internal Medicine at <http://www.annals.org/>, and Epidemiology at <http://www.epidem.com/>). Information on the STROBE Initiative is available at [www.strobe-statement.org](http://www.strobe-statement.org).

### **3. Supplementary information**

#### **Members of the Spanish Society of Nephrology COVID-19 Group**

Adelaida Morales Umpiérrez, Adoración Martínez Losa, Ainhoa Hernando Rubio, Alba Rivas Oural, Alberto Rodríguez Benot, Alejandra Maxorata Álvarez González, Alejandro Pérez Alba, Alejandro Soria Villén, Alfonso Cubas Alcaraz, Alfonso Iglesias, Alfonso Pobes Martínez de Salinas, Álvaro Ossorio Anaya, Amir Shabaka Fernández, Amparo Bernat García, Ana Pérez Rodríguez, Ana Roca Muñoz, Ana Beatriz Muñoz Díaz, Ana Cristina Andrade López, Ana Hernández Vicente, Ana Isabel Díaz Mareque, Ana Isabel Martínez Díaz, Ana Isabel Martínez Puerto, Ana María Ramos Verde, Ana Roca Muñoz, Ana Rodriguez-Carmona, Anabertha Narváez Benítez, Andrés Villegas Fuentes, Angel.M Sevillano Prieto, Aniana Oliet Palá, Anna Buxeda i Porras, Anna Gallardo Pérez, Anna Patricia Balius Matas, Antía López Iglesias, Antoni Bordils Gil, Antonio Crespo Navarro, Antonio Franco Esteve, Antonio Gascón Mariño, Antonio Pérez Pérez, Aránzazu Márquez Corbella, Argimiro Gándara Martínez, Armando Coca Rojo, Auxiliadora Mazuecos, Basilio Martín Urcuyo, Beatriz Diez Ojea, Beatriz María Durá Gúrpide, Begoña Rincón Ruiz, Belén Gómez Giralda, Belén Moragrega, Boris Gonzales Candia, Bruna Natacha Leite Costa, Camino García Monteavaro, Carlos Antonio Soto Montañez, Carlos Íñiguez Villalón, Carlos Jarava Mantecón, Carlos Jesús Cabezas Reina, Carlos Jiménez Martín, Carmen Cabré Menéndez, Carmen Robledo Zulet, Carola Arcal Cunillera, Cassandra Emma Puig Hooper, Cecilia Dall'Anese Siegenthaler, Cecilia Montoyo Castillo, Celestino Piñera Haces, Clara Sanz García, Claudio José Hornos Hornos, Concepción Alamo Caballero, Cristina Canal Girol, Cristina Galeano Álvarez, Cristina Jimeno Griñó, Cristina Lucas Álvarez, Cristina Medrano Villarroya, Cristóbal Donapetry García, Charo Llópez Carratala, Daniel Eduardo Villa Hurtado, David

Rodríguez Santarelli, Diana Manzano Sánchez, Diego Rodríguez Puyol, Dioné González Ferri, Edoardo Melilli, Eduardo Bosque Muñoz, Eduardo Muñoz de Bustillo Llorente, Elena Araceli Jiménez Víbora, Elena Astudillo Cortés, Elena Calvo, Elena Castellón Lavilla, Elena Jiménez Civera, Elena Gutiérrez Solis, Elena Olivar Pérez, Elena Vaquero Párrizas, Elvira Esquivias de Motta, J. Emilio Sánchez Álvarez, Emma Huarte Loza, Enrique Pelaez Perez, Enriqueta González Rodríguez, Ernesto Francisco Valga Amado, Ernesto José Fernández Tagarro, Eva Alvarez, Eva Gavela Martínez, Felipe Sarró Sobrín, Felisa Martínez Sánchez, Fernando Fernandez Giron, Fernando Gil Catalinas, Fernando Henriquez Palop, Fernando Simal Blanco, Fernando Tornero Molina, Francesc Moreso Mateos, Francisco Roca Oporto, Francisco Javier Centellas Pérez, Francisco Javier Ahijado Hormigos, Francisco Llamas fuentes, Gabriel Bernal Blanco, Gabriel Ledesma Sánchez, Gema Velasco Barrero, Gracia M<sup>a</sup> Alvarez Fernández, Greissi Jeniree Garcia Bonilla, Guadalupe Caparrós Tortosa, Guadalupe Tabernero Fernández, Guillermo Alcalde Bezhold, Gustavo Useche Bonilla, Helena Díaz Cambre, Hernando Trujillo Cuéllar, Ignacio Cidraque Vella, Ignacio López Alejaldre, Inés Aragoncillo Sauco, Inmaculada Lorenzo González, Iñigo Moina Eguren, Isabel Beneyto Castelló, Isabel Berdud Godoy, Isabel Garcia Mendez, Isabel Maria Pérez Flores, Isabel María Saura Luján, Iván Chamorro Bucheli, Jaime Sanz García, Jary Perello Martinez, Javier Arrieta Lezama, Javier Juega

Javier Vian Pérez, Jessica Isabel Urdaneta Colmenares, Jesus Calviño Varela, Jesús Grande Villoria, Jesus Martin Garcia, Joan Albert Fernández Roig, Joan Manuel Gascó Company, Joaquín de Juan Ribera, Joaquín Manrique Escola, Jorge Reichert, José Antonio Gómez Puerta, José Antonio Herrero Calvo, José Jesús Broseta Monzó, José Luis Pérez Canga, José Portolés Pérez, Josefa Martin Rivas, Juan Carlos Martínez Ocaña, Juan Carlos Ruiz San Millán, Juan Casas Todolí, Juan Cristobal Santacruz Mancheno, Juan Manuel Buades Fuster, Juan manuel Cazorla

lopez, Juan Rey Valeriano, Juan Villaro Gumpert, Julia Kanter, July Vanessa Osma Capera, Laura Álvarez García, Laura Espinosa Román, Laura Llinàs Mallol, Laura Muñoz Pacios, Laura Sánchez Rodríguez, Laureano Perez Oller, Leonidas Cruzado Vega, Lien Winderickx, Liliana Morán Caicedo, Lucía Sobrino Díaz, Luis Alberto Blázquez Collado, Luis Alberto Sánchez Cámara, Luis Fernando Domínguez Reina, Luis Fernando Morán Fernández, Luis Gil Sacaluga, Luz María Cuiña Barja, M<sup>a</sup> José Soler Romeo, M. Jose Aladrén Regidor, M<sup>a</sup> Dolores Prados Garrido, M<sup>a</sup> Elena González García, M<sup>a</sup> Gloria Rodríguez Goyanes, M<sup>a</sup> Jesús Moyano Franco, M<sup>a</sup> José Fernández-Reyes Luis, M<sup>a</sup> Teresa Naya Nieto, M<sup>a</sup> Victoria Guijarro Abad, M<sup>a</sup> Carmen Ruiz Fuentes, Manuel Heras Benito, Manuel Ramos Díaz, Margarita Delgado Cordova, Margarita Montserrat Pousa Ortega, Maria Crucio Lopez, María Antonia Fernández Solís, María Auxiliadora Bajo Rubio, Maria Begoña Aurrekoetxea Fernandez, Maria de los Ángeles Rodríguez Pérez, María del Mar Rodríguez de Oña, Maria Dolores Albero Molina, María Dolores Redondo Pachón, María Esperanza Moral Berrio, María Eugenia Palacios Gómez, María Gabriela Sánchez Márquez, María Isabel Jimeno Martín, María Isabel Martínez Marín, Maria Jesús Castro Vilanova, María Jiménez Herrero, María José Marco Guerrero, María Lourdes Pérez Tamajón, Maria Luisa Martin Conde, María Luisa Navarro López, Maria Luisa Suarez Fernandez, Maria Molina Gomez, María Noel Martina Lingua, María Ovidia López Oliva, María Pérez Fernández, Maria Pilar Pérez del Barrio, María Sánchez Sánchez, María Teresa Rodrigo de Tomás, María Teresa García Falcón, María Verónica Torres Jaramillo, Maria Victoria Martin Hidalgo-Barquero, Mariana Garbiras, Marisol Ros Romero, Marta Albalate Ramón, Marta Crespo Barrio, Marta Luzón Alonso, Marta Sánchez Heras, Martín Giorgi González, Mercedes Albaladejo Pérez, Mercedes González Moya, Miguel Angel González Rico, Miguel Ángel Suárez Santistebam, Miguel Rodeles del Pozo, Milagros Fernández Lucas, Miquel Blasco Pelicano, M<sup>a</sup> Dolores Arenas Jiménez, Montserrat

Belart Rodríguez, Montserrat Picazo Sánchez, Natalia Blanco Castro, Nestor Gabriel Toapanta Gaibor, Neus Rodriguez Farre, Núria Garra Moncau, Nuria García Fernández, Oihana Larrañaga Zabaleta, Omar Miranda Espinal, Orlando Siverio Morales, Oscar Garcia Uriarte, Oscar Rolando Durón Vargas, Pablo Castro de la Nuez, Paloma Leticia Martín Moreno, Patricia de Sequera Ortiz, Paula Munguía Navarro, Pedro Abáigar Luquin, Pedro Jesús Labrador Gómez, Pedro Vidau Arguelles, Pilar Fraile Gómez, R Alvarez, Rafael Garcia Maset, Ramón Jesús Devesa Such, Ramón López-Menchero Martínez, Raquel Díaz Mancebo, Raquel Ojeda López, Raquel Santana Estupiñán, Raúl Edilberto Alvarado Gutiérrez, Raúl García Castro, Roberto Holgado Salado, Rocío Echarri Carrillo, Rodrigo Avellaneda Campos, Román Hernández Gallego, Rosa Garcia Osuna, Rosa Maria Ruiz-Calero Cendrero, Rosa Palomar Fontanet, Rosa Sánchez Hernández, Rosalía Valero San Cecilio, Sagrario García Rebollo, Sagrario Soriano Cabrera, Sandra Beltrán Catalán, Sandra Castellano Gasch, Sara Huertas Salazar, Secundino Cigarrán Guldris, Sergio García Marcos, Sheila Cabello Pelegrin, Silvia Benito García, Silvia Collado Nieto, Silvia González Sanchidrián, Silvia Moreno Loshuertos, Silvia Ros Rúa, Sofía Zárraga Larrondo, Teresa Bada Bosch, Teresa Cordal Martínez, Verónica López Jiménez, Vicente Paraíso Cuevas, Victoria Oviedo, Virginia López de la Manzanara Pérez, Yanina García Marcote, Zakariae Koraichi Rabie.
